# Supplementary material for: Evaluation of commercial probiotic lactic cultures against biofilm formation by Cronobacter sakazakii
Source: PubMed Central journal article supplement — Intest Res. 2018 Dec 3;17(2):192–201. doi: 10.5217/ir.2018.00106 (PMC6505092; doi:10.5217/ir.2018.00106), 2018-12-03
Supplement: ir-2018-00106-suppl.pdf [file ir-2018-00106-suppl.pdf]

See “Evaluation of commercial probiotic lactic cultures against biofilm formation by *Cronobacter sakazakii*” on page 192-201.

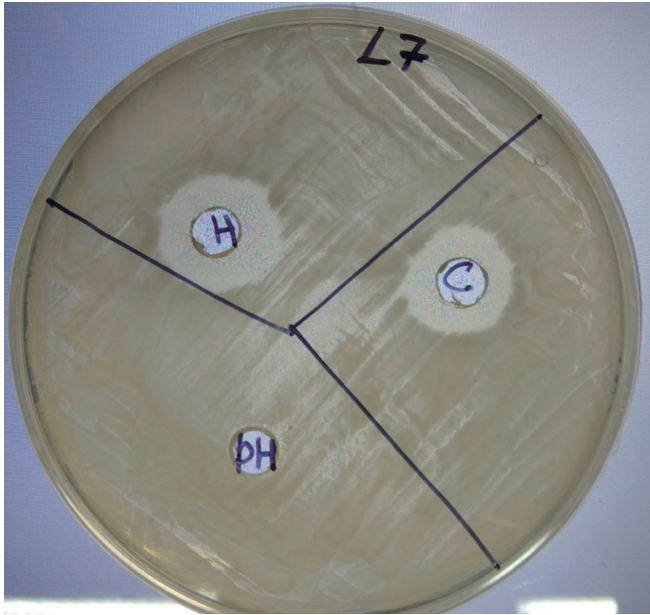

**Supplementary Fig. 1.** Antimicrobial activity of different fractions of cell-free supernatant (CFS) against *Cronobacter sakazakii* using agar well assay. H, heat neutralized CFS; C, untreated CFS; pH, pH neutralized CFS.
